# Supplementary material for: Fruiting body form, not nutritional mode, is the major driver of diversification in mushroom-forming fungi
Source: PubMed Central journal article supplement — Proc Natl Acad Sci U S A. 2020 Nov 30;117(51):32528–34. doi: 10.1073/pnas.1922539117 (PMC7768725; doi:10.1073/pnas.1922539117), 2020-11-30
Supplement: pnas.1922539117.sapp.pdf [file pnas.1922539117.sapp.pdf]

Supplementary Information for

## Fruiting body form, not nutritional mode, is the major driver of diversification in mushroom-forming fungi

Marisol Sánchez-García<sup>a,b</sup>, Martin Ryberg<sup>c</sup>, Faheema Kalsoom Khan<sup>c</sup>, Torda Varga<sup>d</sup>, László G. Nagy<sup>d</sup>, and David S. Hibbett<sup>a,1</sup>

<sup>a</sup> Biology Department, Clark University, Worcester, MA 01610, USA

<sup>b</sup> Uppsala Biocentre, Department of Forest Mycology and Plant Pathology, Swedish University of Agricultural Sciences, SE-75005, Uppsala, Sweden

<sup>c</sup> Department of Organismal Biology, Evolutionary Biology Centre, Uppsala University, Uppsala, 752 36, Sweden

<sup>d</sup> Synthetic and Systems Biology Unit, Institute of Biochemistry, Biological Research Center, Szeged, 6726, Hungary

<sup>1</sup> David S. Hibbett

Email: [dhibbett@clarku.edu](mailto:dhibbett@clarku.edu)

This PDF file includes:

Figures S1 to S14

Tables S2 to S19

SI References

Other supplementary information for this manuscript include the following:

Concatenated alignment

Phylogenetic tree

Character state coding (morphology and nutritional modes)

Table S1: Excel file with Genbank accession numbers of the sequences used to reconstruct the megaphylogeny

These files are available via the Open Science Framework (OSF) at: <https://osf.io/y2vns/>

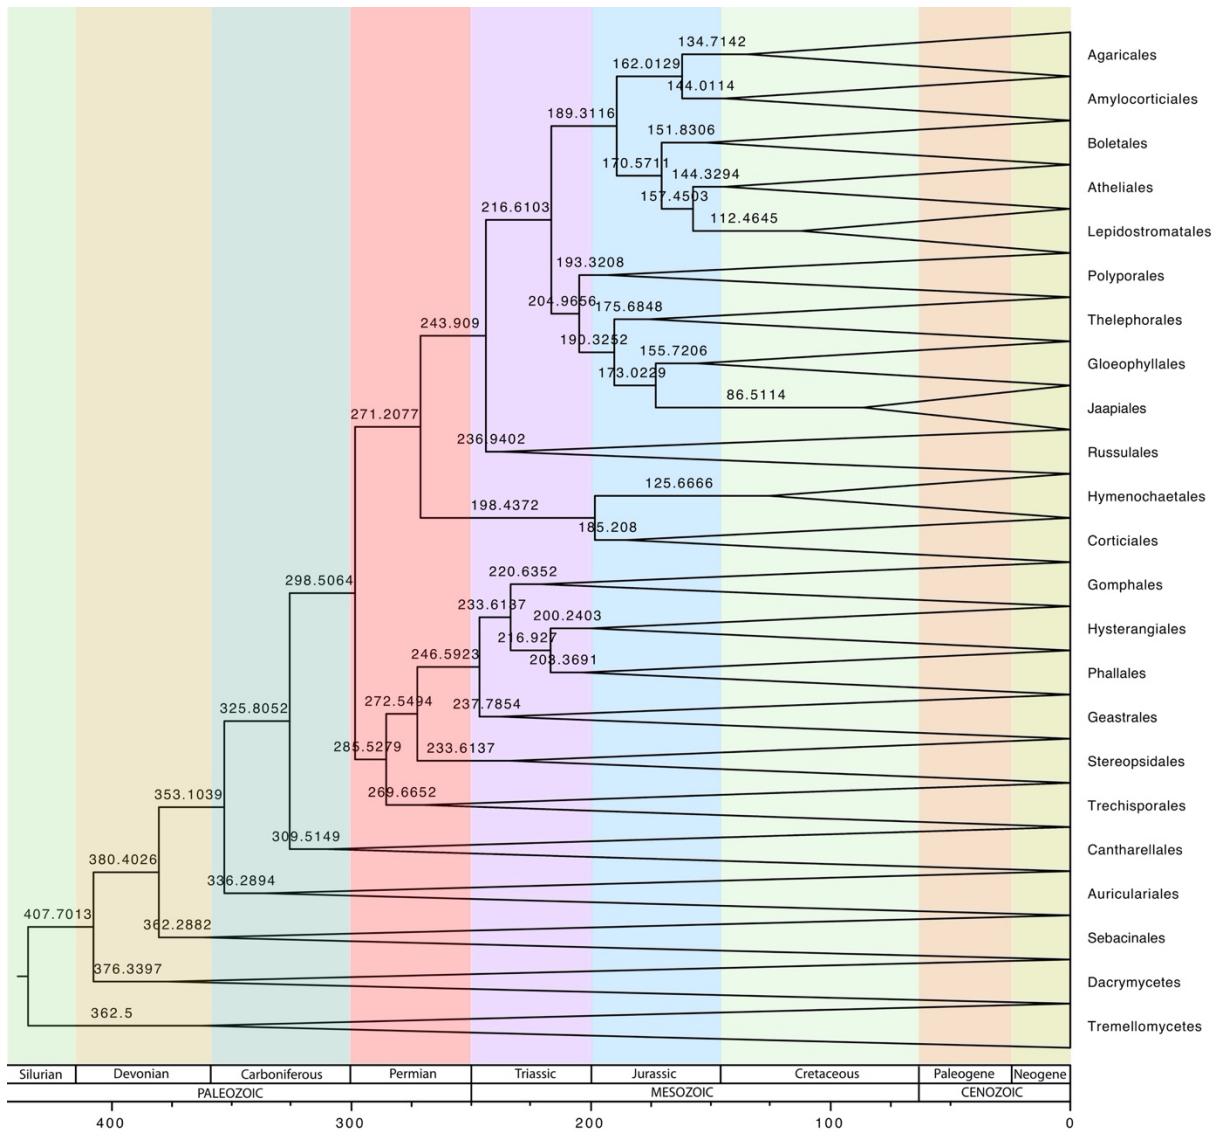

**Figure S1.** Ultrametric tree showing the origin of each order within the Agaricomycetes obtained with chronopl using 6 fossil calibrations. Numbers above branches indicate time in Mya.

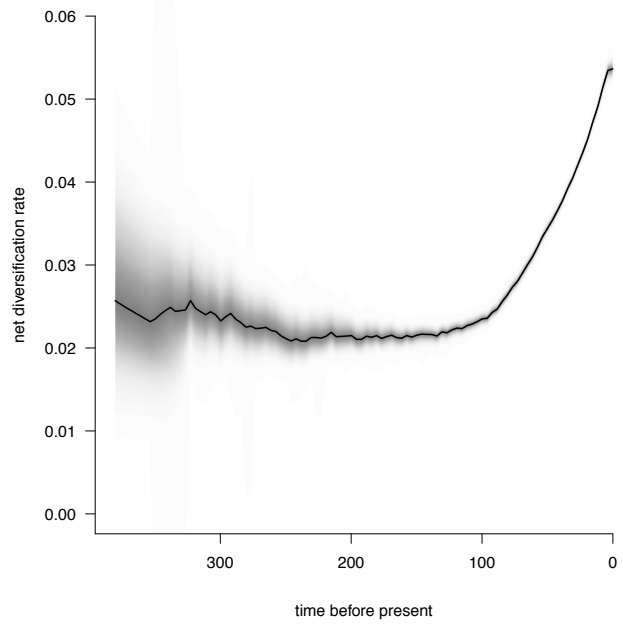

**Figure S2.** Rate through time plot of Agaricomycetes. Shading indicates confidence in the evolutionary rate reconstruction.

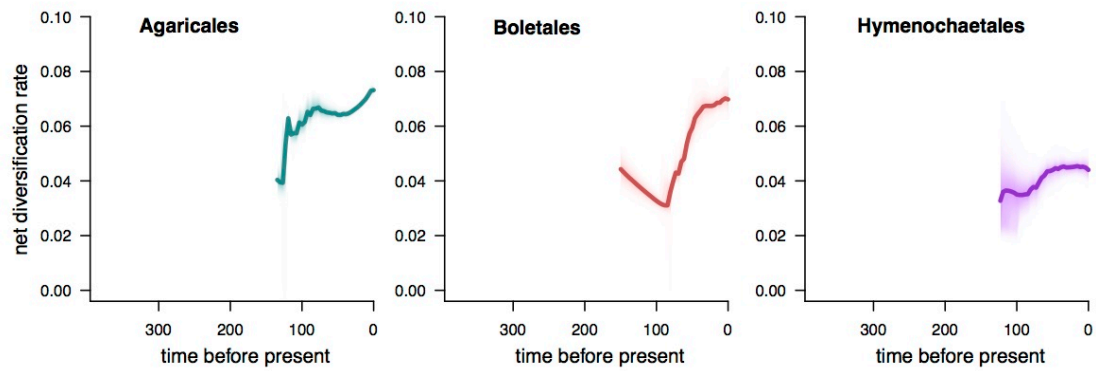

**Figure S3.** Rate through time plot showing three of the orders of Agaricomycetes with an increase of net diversification rate during the Cretaceous continuing into the Cenozoic. Shading indicates confidence in the evolutionary rate reconstruction.

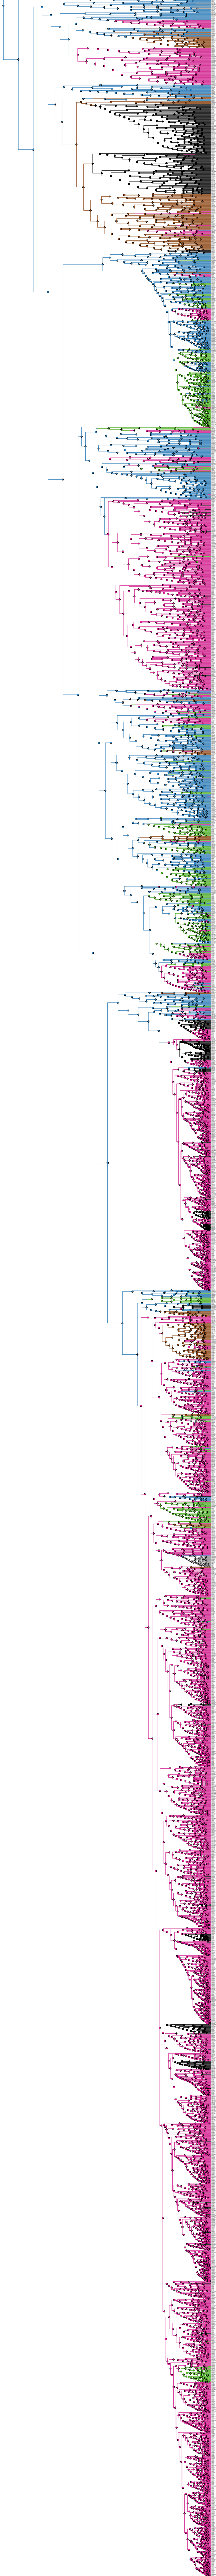

Figure S4. Phylogenetic tree of the Agaricomycetes with ancestral state reconstruction of fruiting-body morphology types. The original PDF file can be found in the OSF repository: <https://osf.io/2vms/>

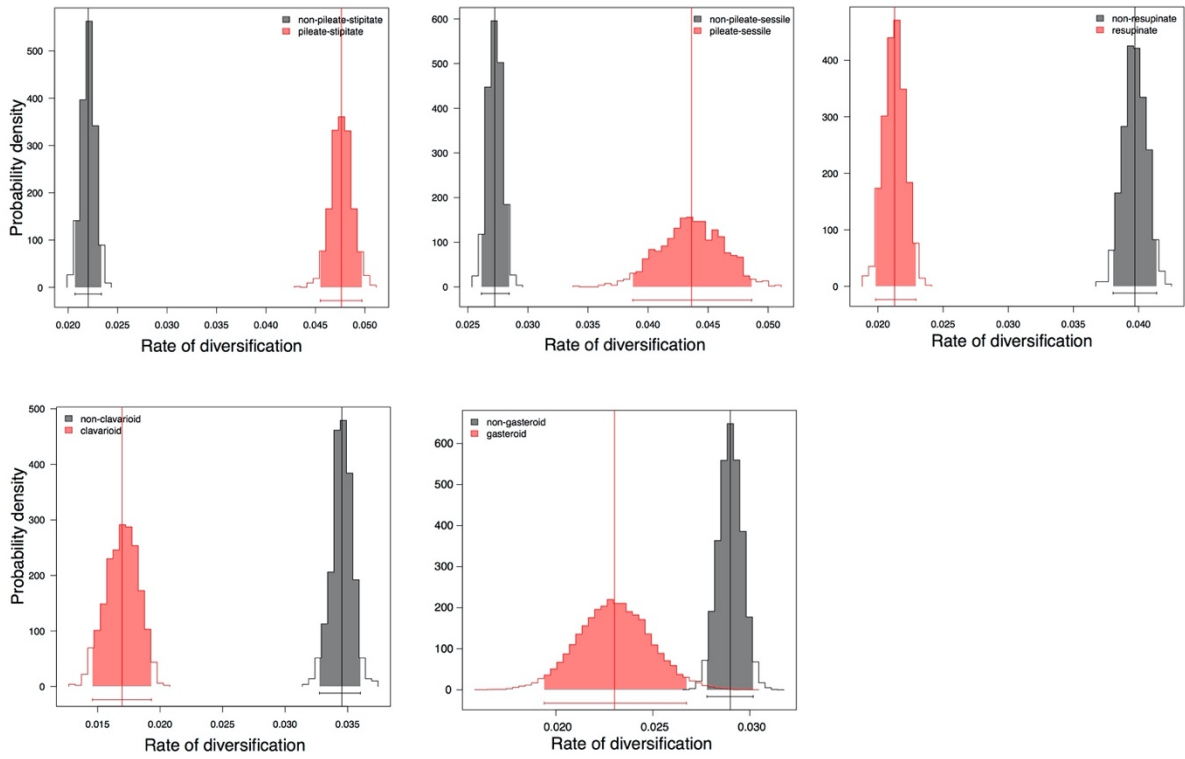

**Figure S5.** Posterior probability distributions of net diversification rates (speciation minus extinction) from the BiSSE model evaluating five types of morphology. The bar underneath each distribution represents the 95% credible interval obtained from the posterior distribution. The vertical lines represent the mean.

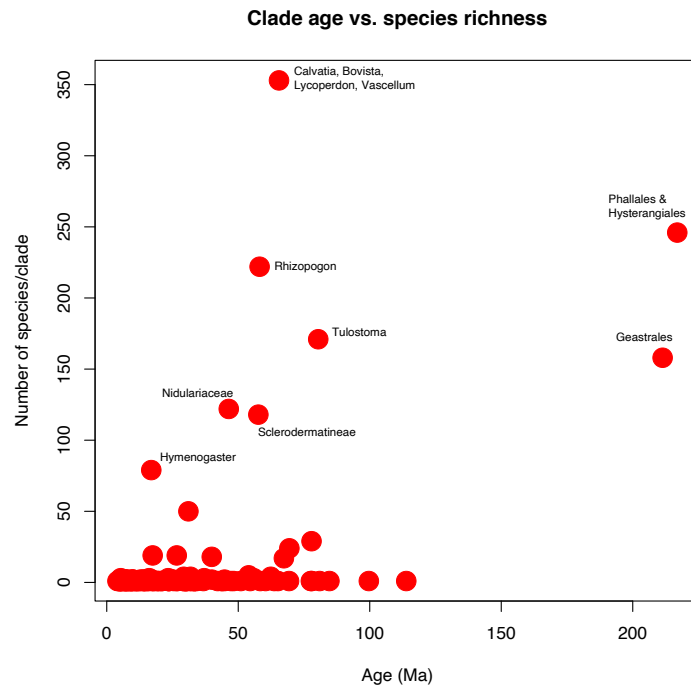

**Figure S6.** Clade age vs. estimated species richness, each dot represents a gasteroid clade.

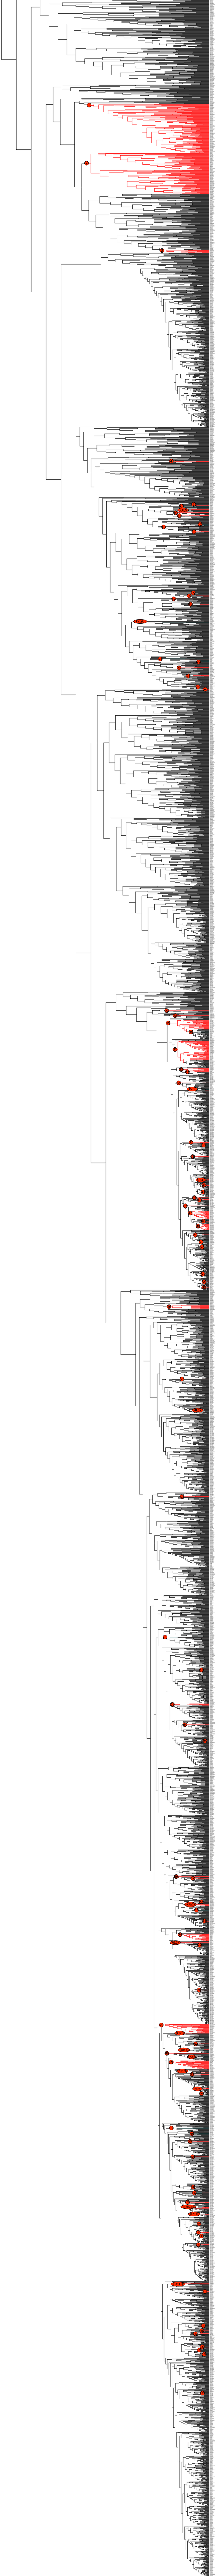

Figure S7. Phylogenetic tree of the Agaricomycetes showing origins of gasteroid forms. The original PDF file can be found in the OSF repository: <https://osf.io/v2ms/>



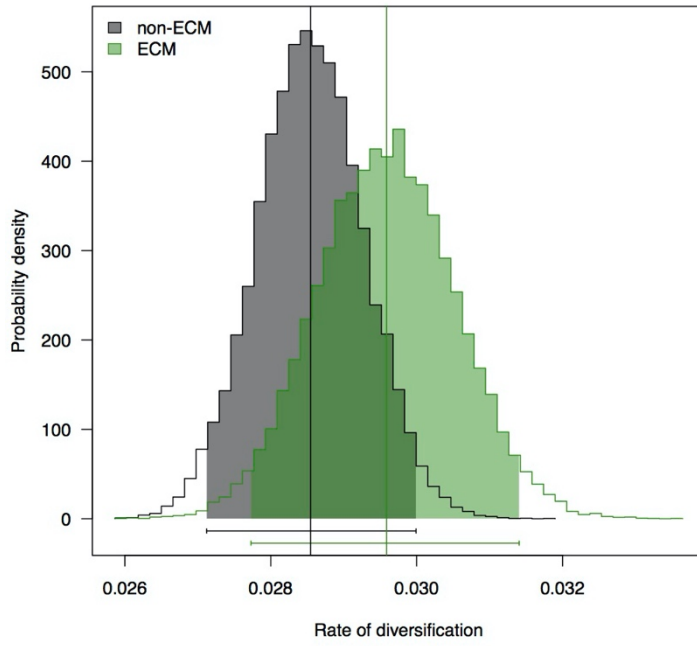

**Figure S8.** Posterior probability distributions of net diversification rates (speciation minus extinction) from the BiSSE model evaluating coding regime I. The bar underneath each distribution represents the 95% credible interval obtained from the posterior distribution. The vertical lines represent the mean.

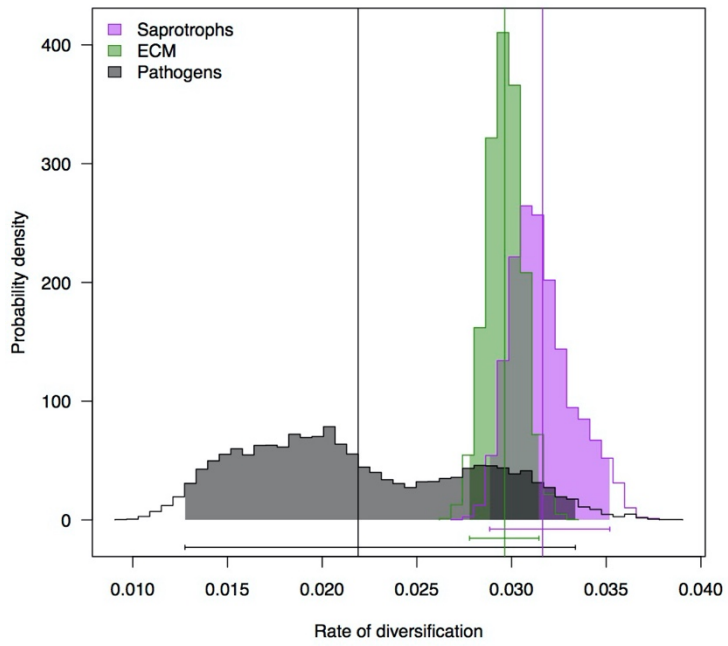

**Figure S9.** Posterior probability distributions of net diversification rates (speciation minus extinction) from the MuSSE model evaluating coding regime II. The bar underneath each distribution represents the 95% credible interval obtained from the posterior distribution. The vertical lines represent the mean.

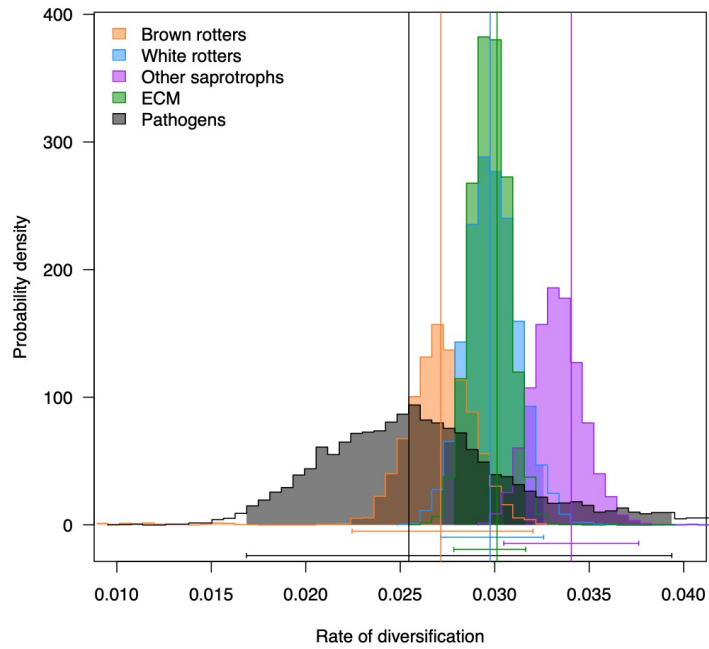

**Figure S10.** Posterior probability distributions of net diversification rates (speciation minus extinction) from the MuSSE model evaluating coding regime IV. The bar underneath each distribution represents the 95% credible interval obtained from the posterior distribution. The vertical lines represent the mean.

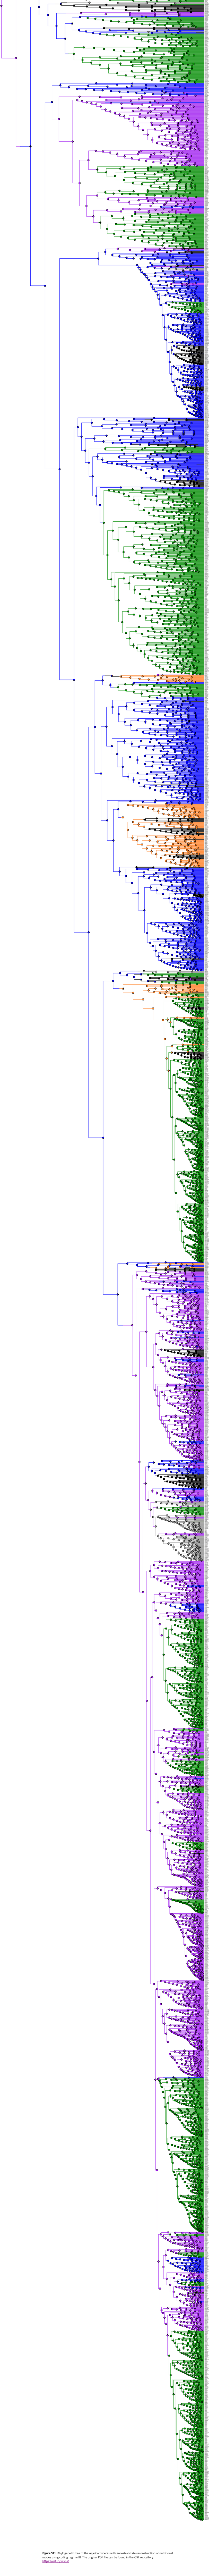

Figure S11. Phylogenetic tree of the Agaricomycetes with ancestral state reconstruction of nutritional modes using coding regime III. The original PDF file can be found in the OSF repository: <https://osf.io/y2rnc/>.

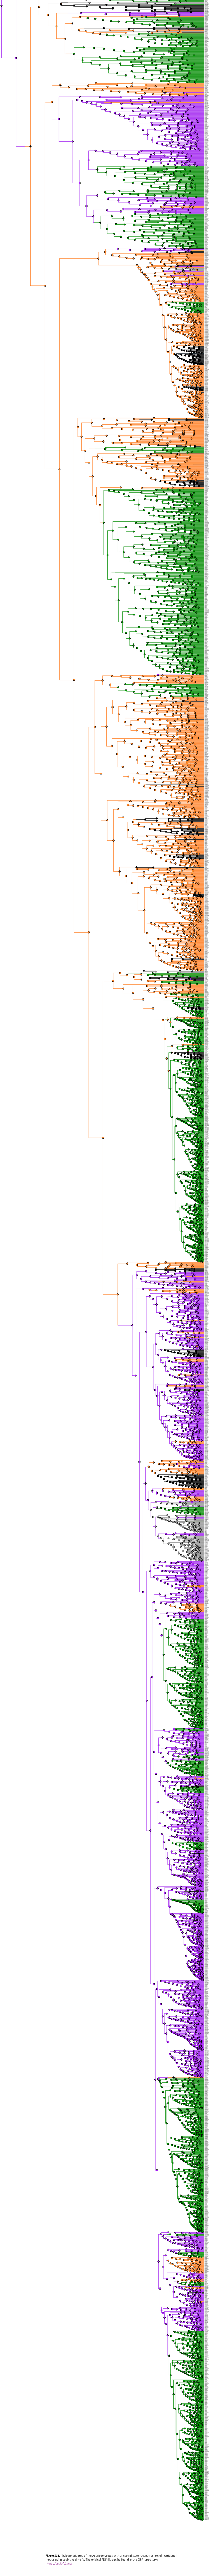

**Figure S12.** Phylogenetic tree of the Agaricomycetes with ancestral state reconstruction of nutritional modes using coding regime IV. The original PDF file can be found in the OSF repository: <https://osf.io/v2ymz/>

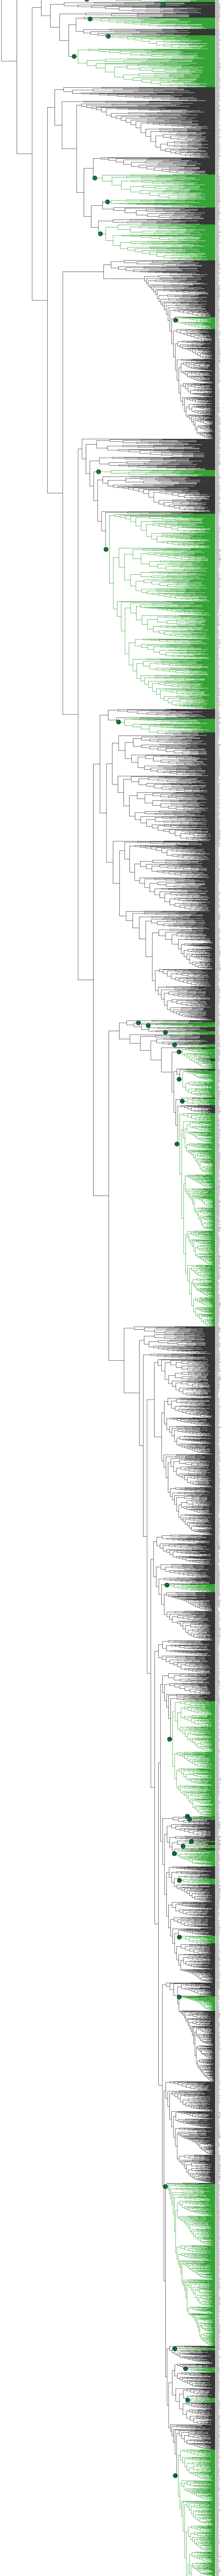

Figure 533. Phylogenetic tree of the Agaricomycetes showing origins of the ECM mode. The original PDF file can be found in the OSF repository: <https://osf.io/y2m5/>

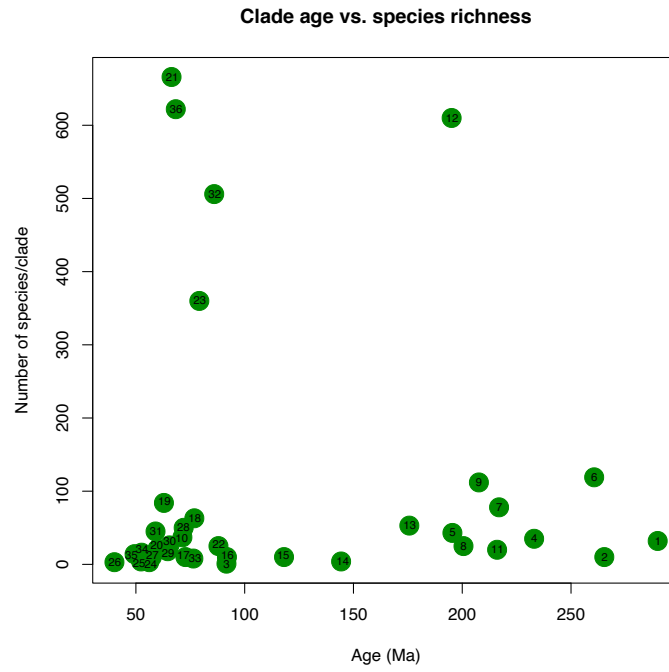

**Figure S14.** Clade age vs. estimated species richness, each dot represents an ECM clade. Numbers correspond to those in figure S13 and table S17.

**Table S1.** Genbank numbers of the sequences used to reconstruct the megaphylogeny. The table can be found in the OSF repository: <https://osf.io/y2vns/>

**Table S2.** Parameter estimates from the MuSSE Maximum Likelihood (ML) analysis evaluating five types of morphology

|                          | Pileate-stipitate | Pileate-sessile | Resupinate | Clavarioid | Gasteroid |
|--------------------------|-------------------|-----------------|------------|------------|-----------|
| Speciation rate          | 0.08878           | 0.06168         | 0.02490    | 0.02489    | 0.05916   |
| Extinction rate          | 0.03883           | 0.02226         | 0.00520    | 0.00000    | 0.03295   |
| Net diversification rate | 0.04995           | 0.03942         | 0.0197     | 0.02489    | 0.02621   |

**Table S3.** Morphology MuSSE model testing. All models were compared against the unconstrained model ( $\lambda$  = speciation rate;  $\mu$  = extinction rate;  $r$  = net diversification rate;  $q$  = transition rate; AIC = Akaike information criterion). The best model is indicated in bold. \*\*\*P < 0.001.

| Model                                                                             | Df | Ln-likelihood | AIC   | $\chi^2$ | P(> Chi )     |
|-----------------------------------------------------------------------------------|----|---------------|-------|----------|---------------|
| Unconstrained model                                                               | 30 | -41288        | 82637 |          |               |
| Equal speciation and extinction rate ( $r_1=r_2=r_3=r_4=r_5$ )                    | 22 | -42326        | 84696 | 2075.67  | < 2.2e-16 *** |
| Equal speciation rate ( $\lambda_1=\lambda_2=\lambda_3=\lambda_4=\lambda_5$ )     | 26 | -41582        | 83217 | 587.98   | < 2.2e-16 *** |
| Equal extinction rate ( $\mu_1=\mu_2=\mu_3=\mu_4=\mu_5$ )                         | 26 | -41362        | 82776 | 2075.67  | < 2.2e-16 *** |
| Equal diversification rate pileate-stipitate and pileate-sessile ( $r_1=r_2$ )    | 28 | -41333        | 82722 | 89.057   | < 2.2e-16 *** |
| Equal diversification rate resupinate, clavarioid and gasteroid ( $r_3=r_4=r_5$ ) | 26 | -41370        | 82792 | 163.54   | < 2.2e-16 *** |
| Equal diversification rate clavarioid and gasteroid ( $r_4=r_5$ )                 | 28 | -41327        | 82710 | 76.839   | < 2.2e-16 *** |

**Table S4.** Parameter estimates from the BiSSE analyses evaluating morphology. State 1 always corresponds to the state of interest and state 0 corresponds to the absence of that state ( $\lambda$  = speciation rate;  $\mu$  = extinction rate;  $r$  = net diversification rate;  $q$  = transition rate).

| Pileate - stipitate                                                         | $\lambda_0$ | $\lambda_1$ | $\mu_0$ | $\mu_1$ | $r_0$   | $r_1$   | $q_{01}$ | $q_{10}$ |
|-----------------------------------------------------------------------------|-------------|-------------|---------|---------|---------|---------|----------|----------|
| Unconstrained model                                                         | 0.03849     | 0.09676     | 0.01531 | 0.04909 | 0.02318 | 0.04767 | 0.0006   | 0.00096  |
| Equal speciation rate ( $\lambda_0=\lambda_1$ )                             | 0.06634     | 0.06634     | 0.04883 | 0.00955 | 0.01751 | 0.05679 | 0.00028  | 0.00155  |
| Equal extinction rate ( $\mu_0=\mu_1$ )                                     | 0.0457      | 0.07942     | 0.02527 | 0.02527 | 0.02043 | 0.05415 | 0.00043  | 0.00122  |
| Equal speciation and extinction rate ( $\mu_0=\mu_1, \lambda_0=\lambda_1$ ) | 0.08158     | 0.08158     | 0.05264 | 0.05264 | 0.02894 | 0.02894 | 0.00063  | 0.00094  |
| Equal transition rate ( $q_{01}=q_{10}$ )                                   | 0.03758     | 0.10079     | 0.01379 | 0.0544  | 0.02379 | 0.04639 | 0.00081  | 0.00081  |
| Transition rate $1 \rightarrow 0 = 0$ ( $q_{10}=0$ ) no reversal            | 0.03707     | 0.10459     | 0.00634 | 0.05943 | 0.03073 | 0.04516 | 0.00601  | 0        |
| Transition rate $0 \rightarrow 1 = 0$ ( $q_{01}=0$ )                        | 0.03398     | 0.11117     | 0.0101  | 0.0702  | 0.02388 | 0.04097 | 0        | 0.00185  |
| Pileate-sessile                                                             | $\lambda_0$ | $\lambda_1$ | $\mu_0$ | $\mu_1$ | $r_0$   | $r_1$   | $q_{01}$ | $q_{10}$ |
| Unconstrained model                                                         | 0.06917     | 0.05498     | 0.04086 | 0.0113  | 0.02831 | 0.04368 | 0.00018  | 0.00842  |
| Equal speciation rate ( $\lambda_0=\lambda_1$ )                             | 0.06885     | 0.06885     | 0.04042 | 0.03075 | 0.02843 | 0.0381  | 0.00021  | 0.00747  |
| Equal extinction rate ( $\mu_0=\mu_1$ )                                     | 0.06789     | 0.07345     | 0.03909 | 0.03909 | 0.0288  | 0.03436 | 0.00022  | 0.00712  |



|                                                                                |             |             |         |         |         |         |          |          |
|--------------------------------------------------------------------------------|-------------|-------------|---------|---------|---------|---------|----------|----------|
| Equal speciation and extinction rate ( $\mu_0=\mu_1$ , $\lambda_0=\lambda_1$ ) | 0.06744     | 0.06744     | 0.0378  | 0.0378  | 0.02964 | 0.02964 | 0.00023  | 0.0068   |
| Equal transition rate ( $q_{01}=q_{10}$ )                                      | 0.06685     | 0.08303     | 0.03722 | 0.05483 | 0.02963 | 0.0282  | 0.00067  | 0.00067  |
| Transition rate $1 \rightarrow 0 = 0$ ( $q_{10}=0$ ) no reversal               | 0.06841     | 0.06539     | 0.03904 | 0.03588 | 0.02937 | 0.02951 | 0.00081  | 0        |
| Transition rate $0 \rightarrow 1 = 0$ ( $q_{01}=0$ )                           | 0.06864     | 0.06882     | 0.04068 | 0.03136 | 0.02796 | 0.03746 | 0        | 0.01531  |
| <b>Resupinate</b>                                                              | $\lambda_0$ | $\lambda_1$ | $\mu_0$ | $\mu_1$ | $r_0$   | $r_1$   | $q_{01}$ | $q_{10}$ |
| Unconstrained model                                                            | 0.07117     | 0.02461     | 0.03139 | 0.00193 | 0.03978 | 0.02268 | 0.00028  | 0.00265  |
| Equal speciation rate ( $\lambda_0=\lambda_1$ )                                | 0.06013     | 0.06013     | 0.01716 | 0.04603 | 0.04297 | 0.0141  | 0.00047  | 0.00113  |
| Equal extinction rate ( $\mu_0=\mu_1$ )                                        | 0.06223     | 0.03555     | 0.01831 | 0.01831 | 0.04392 | 0.01724 | 0.00039  | 0.00168  |
| Equal speciation and extinction rate ( $\mu_0=\mu_1$ , $\lambda_0=\lambda_1$ ) | 0.06944     | 0.06944     | 0.04016 | 0.04016 | 0.02928 | 0.02928 | 0.00022  | 0.00242  |
| Equal transition rate ( $q_{01}=q_{10}$ )                                      | 0.06669     | 0.03248     | 0.025   | 0.01525 | 0.04169 | 0.01723 | 0.00083  | 0.00083  |
| Transition rate $1 \rightarrow 0 = 0$ ( $q_{10}=0$ ) no reversal               | 0.07887     | 0.0214      | 0.04523 | 0.00005 | 0.03364 | 0.02135 | 0.00115  | 0        |
| Transition rate $0 \rightarrow 1 = 0$ ( $q_{01}=0$ )                           | 0.07151     | 0.02586     | 0.03123 | 0.00002 | 0.04028 | 0.02584 | 0        | 0.00571  |
| <b>Clavarioid</b>                                                              | $\lambda_0$ | $\lambda_1$ | $\mu_0$ | $\mu_1$ | $r_0$   | $r_1$   | $q_{01}$ | $q_{10}$ |
| Unconstrained model                                                            | 0.06843     | 0.02129     | 0.03306 | 0.0025  | 0.03537 | 0.01879 | 0.00005  | 0.00522  |
| Equal speciation rate ( $\lambda_0=\lambda_1$ )                                | 0.0671      | 0.0671      | 0.03289 | 0.05677 | 0.03421 | 0.01033 | 0.00008  | 0.00179  |
| Equal extinction rate ( $\mu_0=\mu_1$ )                                        | 0.06677     | 0.04338     | 0.03159 | 0.03159 | 0.03518 | 0.01179 | 0.00007  | 0.00259  |
| Equal speciation and extinction rate ( $\mu_0=\mu_1$ , $\lambda_0=\lambda_1$ ) | 0.07135     | 0.07135     | 0.04195 | 0.04195 | 0.0294  | 0.0294  | 0.00008  | 0.00094  |
| Equal transition rate ( $q_{01}=q_{10}$ )                                      | 0.07393     | 0.02509     | 0.04344 | 0.00088 | 0.03049 | 0.02421 | 0.00009  | 0.00009  |
| Transition rate $1 \rightarrow 0 = 0$ ( $q_{10}=0$ ) no reversal               | 0.07511     | 0.02414     | 0.04514 | 0       | 0.02997 | 0.02414 | 0.00014  | 0        |
| Transition rate $0 \rightarrow 1 = 0$ ( $q_{01}=0$ )                           | 0.06696     | 0.02059     | 0.02934 | 0       | 0.03762 | 0.02059 | 0        | 0.00838  |
| <b>Gasteroid</b>                                                               | $\lambda_0$ | $\lambda_1$ | $\mu_0$ | $\mu_1$ | $r_0$   | $r_1$   | $q_{01}$ | $q_{10}$ |
| Unconstrained model                                                            | 0.08328     | 0.06796     | 0.05316 | 0.04553 | 0.03012 | 0.02243 | 0.00042  | 0.0001   |
| Equal speciation rate ( $\lambda_0=\lambda_1$ )                                | 0.08195     | 0.08195     | 0.05157 | 0.06138 | 0.03038 | 0.02057 | 0.00045  | 0.00008  |
| Equal extinction rate ( $\mu_0=\mu_1$ )                                        | 0.0838      | 0.07483     | 0.05383 | 0.05383 | 0.02997 | 0.021   | 0.00043  | 0.00009  |
| Equal speciation and extinction rate ( $\mu_0=\mu_1$ , $\lambda_0=\lambda_1$ ) | 0.08221     | 0.08221     | 0.0528  | 0.0528  | 0.02941 | 0.02941 | 0.00038  | 0.00011  |
| Equal transition rate ( $q_{01}=q_{10}$ )                                      | 0.08359     | 0.06408     | 0.05362 | 0.04004 | 0.02997 | 0.02404 | 0.00036  | 0.00036  |
| Transition rate $1 \rightarrow 0 = 0$ ( $q_{10}=0$ ) no reversal               | 0.08347     | 0.06628     | 0.05338 | 0.04364 | 0.03009 | 0.02264 | 0.00041  | 0        |
| Transition rate $0 \rightarrow 1 = 0$ ( $q_{01}=0$ )                           | 0.08529     | 0.05912     | 0.05863 | 0.00388 | 0.02666 | 0.05524 | 0        | 0.02793  |

**Table S5.** Morphology BiSSE model testing. All models were compared against the unconstrained model ( $\lambda$  = speciation rate;  $\mu$  = extinction rate;  $r$  = net diversification rate;  $q$  = transition rate; AIC = Akaike information criterion). The best model is indicated in bold. \*\*\*P < 0.001, \*\*P < 0.01, \*P < 0.05.

| Model                                                                           | Df | Ln-likelihood | AIC   | $\chi^2$ | P(> Chi )     |
|---------------------------------------------------------------------------------|----|---------------|-------|----------|---------------|
| <b>Pileate-stipitate</b>                                                        |    |               |       |          |               |
| Unconstrained model                                                             | 6  | -40552        | 81116 |          |               |
| Equal speciation rate ( $\lambda_0 = \lambda_1$ )                               | 5  | -40762        | 81535 | 420.89   | < 2.2e-16 *** |
| Equal extinction rate ( $\mu_0 = \mu_1$ )                                       | 5  | -40594        | 81198 | 84       | < 2.2e-16 *** |
| Equal speciation and extinction rate ( $\mu_0 = \mu_1, \lambda_0 = \lambda_1$ ) | 4  | -41401        | 82811 | 1698.64  | < 2.2e-16 *** |
| Equal transition rate ( $q_{01} = q_{10}$ )                                     | 5  | -40556        | 81121 | 7.31     | 0.006865 **   |
| Transition rate $1 \rightarrow 0 = 0$ ( $q_{10} = 0$ )<br>no reversal           | 5  | -42087        | 84183 | 3069.09  | < 2.2e-16 *** |
| Transition rate $0 \rightarrow 1 = 0$ ( $q_{01} = 0$ )                          | 5  | -40958        | 81926 | 811.61   | < 2.2e-16 *** |
| <b>Pileate-sessile</b>                                                          |    |               |       |          |               |
| Unconstrained model                                                             | 6  | -40636        | 81283 |          |               |
| Equal speciation rate ( $\lambda_0 = \lambda_1$ )                               | 5  | -40640        | 81289 | 8.41     | 0.003735 **   |
| Equal extinction rate ( $\mu_0 = \mu_1$ )                                       | 5  | -40643        | 81296 | 15.25    | 9.44e-05 ***  |
| Equal speciation and extinction rate ( $\mu_0 = \mu_1, \lambda_0 = \lambda_1$ ) | 4  | -40650        | 81308 | 29.09    | 4.81e-07 ***  |
| Equal transition rate ( $q_{01} = q_{10}$ )                                     | 5  | -40780        | 81570 | 288.61   | < 2.2e-16 *** |
| Transition rate $1 \rightarrow 0 = 0$ ( $q_{10} = 0$ )<br>no reversal           | 5  | -41082        | 82173 | 892.06   | < 2.2e-16 *** |
| Transition rate $0 \rightarrow 1 = 0$ ( $q_{01} = 0$ )                          | 4  | -40775        | 81560 | 279.39   | < 2.2e-16 *** |
| <b>Resupinate</b>                                                               |    |               |       |          |               |
| Unconstrained model                                                             | 6  | -40423        | 80857 |          |               |
| Equal speciation rate ( $\lambda_0 = \lambda_1$ )                               | 5  | -40569        | 81148 | 292.17   | < 2.2e-16 *** |
| Equal extinction rate ( $\mu_0 = \mu_1$ )                                       | 5  | -40460        | 80930 | 74.38    | < 2.2e-16 *** |
| Equal speciation and extinction rate ( $\mu_0 = \mu_1, \lambda_0 = \lambda_1$ ) | 4  | -40905        | 81818 | 964.9    | < 2.2e-16 *** |
| Equal transition rate ( $q_{01} = q_{10}$ )                                     | 5  | -40498        | 81006 | 150.41   | < 2.2e-16 *** |
| Transition rate $1 \rightarrow 0 = 0$ ( $q_{10} = 0$ )<br>no reversal           | 5  | -40983        | 81976 | 1120.53  | < 2.2e-16 *** |
| Transition rate $0 \rightarrow 1 = 0$ ( $q_{01} = 0$ )                          | 4  | -40725        | 81460 | 604.74   | < 2.2e-16 *** |
| <b>Clavarioid/coralloid</b>                                                     |    |               |       |          |               |
| Unconstrained model                                                             | 6  | -39944        | 79901 |          |               |
| Equal speciation rate ( $\lambda_0 = \lambda_1$ )                               | 5  | -39997        | 80004 | 104.94   | < 2.2e-16 *** |
| Equal extinction rate ( $\mu_0 = \mu_1$ )                                       | 5  | -39964        | 79939 | 40.18    | 2.316e-10 *** |
| Equal speciation and extinction rate ( $\mu_0 = \mu_1, \lambda_0 = \lambda_1$ ) | 4  | -40062        | 80132 | 235.9    | < 2.2e-16 *** |
| Equal transition rate ( $q_{01} = q_{10}$ )                                     | 5  | -39972        | 79955 | 56.36    | 6.040e-14 *** |
| Transition rate $1 \rightarrow 0 = 0$ ( $q_{10} = 0$ )<br>no reversal           | 5  | -40091        | 80193 | 293.99   | < 2.2e-16 *** |
| Transition rate $0 \rightarrow 1 = 0$ ( $q_{01} = 0$ )                          | 4  | -40013        | 80036 | 137.48   | < 2.2e-16 *** |
| <b>Gasteroid</b>                                                                |    |               |       |          |               |
| Unconstrained model                                                             | 6  | -40504        | 81020 |          |               |
| Equal speciation rate ( $\lambda_0 = \lambda_1$ )                               | 5  | -40508        | 81026 | 8.2      | 0.004185 **   |
| Equal extinction rate ( $\mu_0 = \mu_1$ )                                       | 5  | -40505        | 81020 | 2.32     | 0.127609      |
| Equal speciation and extinction rate ( $\mu_0 = \mu_1, \lambda_0 = \lambda_1$ ) | 4  | -40524        | 81055 | 39.79    | 2.290e-09 *** |
| Equal transition rate ( $q_{01} = q_{10}$ )                                     | 5  | -40507        | 81023 | 5.51     | 0.018865 *    |
| Transition rate $1 \rightarrow 0 = 0$ ( $q_{10} = 0$ )<br>no reversal           | 5  | -40518        | 81046 | 28.09    | 1.156e-07 *** |
| Transition rate $0 \rightarrow 1 = 0$ ( $q_{01} = 0$ )                          | 4  | -41008        | 82026 | 1008.53  | < 2.2e-16 *** |

**Table S6.** Clades where the origin of a gasteroid form occurred, taxa included in each clade, estimated number of species and the age (Ma) of the clade. Numbers in the first column correspond to those in figure S7.

| Clade | Taxa in each clade                                                                                                                                                                                                                                                                                                                                                        | Estimated number of species | Age (Ma) |
|-------|---------------------------------------------------------------------------------------------------------------------------------------------------------------------------------------------------------------------------------------------------------------------------------------------------------------------------------------------------------------------------|-----------------------------|----------|
| 1     | Geastrales: Sphaerobolus, Schenella, Boninogster, Sclerogaster, Geastrum, Myriostoma                                                                                                                                                                                                                                                                                      | 158                         | 211      |
| 2     | Phallales: Lycogalopsis, Gelopellis, Protubera, Ileodictyon, Clathrus, Laternea, Blumenavia, Pseudocolus, Abrachium Lysurus, Gastrosporium, Mutinus, Itajahya. Hysterangiales: Protubera, Phallogaster, Trappea, Hysterangium, Austrogautieria, Gallacea, Hallingea, Gummiglobus, castoreum, Nothocastoreum, Mesophellia, Andebbia, Malajczukia, Phlebogaster, Aroramyces | 246                         | 217      |
| 3     | Gautieria                                                                                                                                                                                                                                                                                                                                                                 | 29                          | 78       |
| 4     | Leucogaster, Fevansia                                                                                                                                                                                                                                                                                                                                                     | 24                          | 69       |
| 5     | Lactarius falcatus                                                                                                                                                                                                                                                                                                                                                        | 1                           | 24       |
| 6     | Lactarius cressus                                                                                                                                                                                                                                                                                                                                                         | 1                           | 44       |
| 7     | Lactarius pomiolens                                                                                                                                                                                                                                                                                                                                                       | 1                           | 33       |
| 8     | Lactarius shoreae                                                                                                                                                                                                                                                                                                                                                         | 1                           | 29       |
| 9     | Lactarius angiocarpus                                                                                                                                                                                                                                                                                                                                                     | 1                           | 19       |
| 10    | Lactarius echinus                                                                                                                                                                                                                                                                                                                                                         | 1                           | 58       |
| 11    | Lactarius                                                                                                                                                                                                                                                                                                                                                                 | 3                           | 37       |
| 12    | Arcangeliella daucina                                                                                                                                                                                                                                                                                                                                                     | 1                           | 13       |
| 13    | Lactarius stephensii                                                                                                                                                                                                                                                                                                                                                      | 1                           | 85       |
| 14    | Arcangeliella                                                                                                                                                                                                                                                                                                                                                             | 2                           | 14       |
| 15    | Gymnomyces fallax                                                                                                                                                                                                                                                                                                                                                         | 1                           | 29       |
| 16    | Russula                                                                                                                                                                                                                                                                                                                                                                   | 3                           | 23       |
| 17    | Macowanites                                                                                                                                                                                                                                                                                                                                                               | 1                           | 65       |
| 18    | Macowanites/Russula                                                                                                                                                                                                                                                                                                                                                       | 2                           | 17       |
| 19    | Gymnomyces sp                                                                                                                                                                                                                                                                                                                                                             | 1                           | 114      |
| 20    | Russula pumicoidea                                                                                                                                                                                                                                                                                                                                                        | 1                           | 100      |
| 21    | Gymnomyces                                                                                                                                                                                                                                                                                                                                                                | 2                           | 45       |
| 22    | Cystangium                                                                                                                                                                                                                                                                                                                                                                | 1                           | 18       |
| 23    | Russula                                                                                                                                                                                                                                                                                                                                                                   | 2                           | 28       |
| 24    | Russula                                                                                                                                                                                                                                                                                                                                                                   | 4                           | 29       |
| 25    | Macowanites americana                                                                                                                                                                                                                                                                                                                                                     | 1                           | 21       |
| 26    | Macowanites sp                                                                                                                                                                                                                                                                                                                                                            | 1                           | 7        |
| 27    | Sedecula pulvinata                                                                                                                                                                                                                                                                                                                                                        | 1                           | 78       |
| 28    | Gymnopaxillus                                                                                                                                                                                                                                                                                                                                                             | 4                           | 62       |
| 29    | Rhizopogon                                                                                                                                                                                                                                                                                                                                                                | 222                         | 58       |
| 30    | Truncocolumella                                                                                                                                                                                                                                                                                                                                                           | 1                           | 33       |
| 31    | Scleroderma, Diplocystis, Astraeus, Tremelloaster, Calostoma, Pisolithus                                                                                                                                                                                                                                                                                                  | 118                         | 58       |
| 32    | Melanogaster, Alpova                                                                                                                                                                                                                                                                                                                                                      | 18                          | 40       |
| 33    | Melanogaster, Alpova                                                                                                                                                                                                                                                                                                                                                      | 19                          | 27       |
| 34    | Mycoamaranthus                                                                                                                                                                                                                                                                                                                                                            | 3                           | 56       |
| 35    | Royoungia coccineinana                                                                                                                                                                                                                                                                                                                                                    | 1                           | 21       |
| 36    | Royoungia                                                                                                                                                                                                                                                                                                                                                                 | 2                           | 7        |
| 37    | Soliococcus                                                                                                                                                                                                                                                                                                                                                               | 2                           | 17       |
| 38    | Kombocles                                                                                                                                                                                                                                                                                                                                                                 | 1                           | 10       |
| 39    | Gymnogaster                                                                                                                                                                                                                                                                                                                                                               | 1                           | 30       |
| 40    | Gastroboletus turbinatus                                                                                                                                                                                                                                                                                                                                                  | 1                           | 5        |
| 41    | Gastroboletus sp.                                                                                                                                                                                                                                                                                                                                                         | 1                           | 5        |
| 42    | Gastroboletus sp.                                                                                                                                                                                                                                                                                                                                                         | 1                           | 5        |
| 43    | Costatisporus cyanescens                                                                                                                                                                                                                                                                                                                                                  | 1                           | 9        |
| 44    | Spongiforma thailandica                                                                                                                                                                                                                                                                                                                                                   | 2                           | 25       |
| 45    | Royoungia                                                                                                                                                                                                                                                                                                                                                                 | 2                           | 10       |
| 46    | Castallanea pakaraimophila                                                                                                                                                                                                                                                                                                                                                | 1                           | 44       |

|     |                                                                  |     |    |
|-----|------------------------------------------------------------------|-----|----|
| 47  | Octaviana                                                        | 50  | 31 |
| 48  | Chamomixia                                                       | 3   | 5  |
| 49  | Roosbeevera                                                      | 19  | 17 |
| 50  | Heliogaster                                                      | 2   | 13 |
| 51  | Octaviana ??                                                     | 2   | 8  |
| 52  | Jimtrappea, Duraniella                                           | 2   | 7  |
| 53  | Mackintoshia persica                                             | 1   | 12 |
| 54  | Boletus semigastroideus                                          | 1   | 4  |
| 55  | Boletus subalpinus                                               | 1   | 6  |
| 56  | Stephanospora, Mayamontana                                       | 17  | 67 |
| 57  | Guyanagaster                                                     | 2   | 40 |
| 58  | Cribbea gloriosa                                                 | 1   | 9  |
| 59  | Cribbea raphanipes                                               | 1   | 8  |
| 60  | Nia vibrissa                                                     | 2   | 25 |
| 61  | Limnoperdon incarnatum                                           | 1   | 81 |
| 62  | Amanita arenaria                                                 | 1   | 55 |
| 63  | Amanita                                                          | 5   | 54 |
| 64  | Amanita torrendi                                                 | 1   | 45 |
| 65  | Amanita sp H909                                                  | 1   | 8  |
| 66  | Entoloma prismaticum                                             | 1   | 60 |
| 67  | Richoniella sp.                                                  | 1   | 30 |
| 68  | Entoloma asterosporum                                            | 1   | 14 |
| 69  | Richoniella                                                      | 1   | 32 |
| 70  | Richoniella                                                      | 3   | 16 |
| 71  | Entoloma hypogaeum                                               | 1   | 8  |
| 72  | Richoniella                                                      | 1   | 24 |
| 73  | Richoniella                                                      | 1   | 6  |
| 74  | Nidulariaceae: Nidula, Mycocalia, Crucibulum, Cyathus, Nidularia | 122 | 46 |
| 75  | Hydnangium                                                       | 1   | 51 |
| 76  | Hydnangium                                                       | 1   | 48 |
| 77  | Hydnangium                                                       | 1   | 14 |
| 78  | Psathyrella secotioides                                          | 1   | 18 |
| 79  | Tulostoma                                                        | 171 | 80 |
| 80  | Montagnea                                                        | 1   | 32 |
| 81  | Montagnea                                                        | 1   | 42 |
| 82  | Galeropsis                                                       | 1   | 19 |
| 83  | Lepiota viridigleba                                              | 1   | 10 |
| 84  | Lepiota geogenia                                                 | 1   | 33 |
| 85  | Gigasperma                                                       | 1   | 5  |
| 86  | Podaxis                                                          | 1   | 78 |
| 87  | Lycoperdaceae (name from GenBank)                                | 1   | 20 |
| 88  | Lycoperdaceae (name from GenBank)                                | 1   | 12 |
| 89  | Calvatia, Bovista, Lycoperdon, Vascellum                         | 353 | 66 |
| 90  | Macrolepiota gasteroidea                                         | 1   | 37 |
| 91  | Mycenastrum corium                                               | 1   | 47 |
| 92  | Macrolepiota turbinata                                           | 1   | 16 |
| 93  | Chlorophyllum agaricoides                                        | 1   | 16 |
| 94  | Agaricus                                                         | 2   | 6  |
| 95  | Barcheria                                                        | 1   | 11 |
| 96  | Agaricus deserticola                                             | 2   | 5  |
| 97  | Gigasperma                                                       | 1   | 69 |
| 98  | Thaxterogaster                                                   | 1   | 30 |
| 99  | Cortinarius as Amarrendia                                        | 1   | 34 |
| 100 | Thaxterogaster campbellae                                        | 1   | 30 |
| 101 | Thaxterogaster ohauensis                                         | 1   | 24 |
| 102 | Thaxterogaster                                                   | 2   | 14 |

|     |                              |    |    |
|-----|------------------------------|----|----|
| 103 | Thaxterogaster/Cortinarius   | 4  | 32 |
| 104 | Thaxterogaster               | 1  | 27 |
| 105 | Protoglossum                 | 2  | 7  |
| 106 | Thaxterogaster               | 1  | 27 |
| 107 | Thaxterogaster               | 1  | 7  |
| 108 | Cortinarius pavelekii        | 2  | 8  |
| 109 | Cortinarius as Amarrendia    | 1  | 15 |
| 110 | Cortinarius globuliformis    | 2  | 10 |
| 111 | Cortinarius sejuctus         | 1  | 14 |
| 112 | Protoglossum/Cortinarius     | 2  | 10 |
| 113 | Setchelliogaster             | 1  | 64 |
| 114 | Descomyces                   | 1  | 17 |
| 115 | Wakefieldia                  | 1  | 25 |
| 116 | Gastrocybe                   | 1  | 7  |
| 117 | Psilocybe weraroa            | 1  | 9  |
| 118 | Galeropsis                   | 1  | 12 |
| 119 | Hymenogaster                 | 79 | 17 |
| 120 | Pholiota nubigena            | 1  | 8  |
| 121 | Leratiomyces erythrocephalus | 1  | 11 |
| 122 | Clavogaster virescens        | 1  | 5  |
| 123 | Auritella geoaustralis       | 1  | 7  |

**Table S7.** Morphology BiSSE model testing when pruning two clades that show transitions from a gasteroid to a non-gasteroid state. All models were compared against the unconstrained model ( $\lambda$  = speciation rate;  $\mu$  = extinction rate;  $r$  = net diversification rate;  $q$  = transition rate; AIC = Akaike information criterion). The best model is indicated in bold. \*\*\*P < 0.001.

| Gasteroid test                                                                  |   |        |       |        |               |
|---------------------------------------------------------------------------------|---|--------|-------|--------|---------------|
| Unconstrained model                                                             | 6 | -40248 | 80509 |        |               |
| Equal speciation rate ( $\lambda_0 = \lambda_1$ )                               | 5 | -40252 | 80515 | 7.22   | 0.007209**    |
| Equal extinction rate ( $\mu_0 = \mu_1$ )                                       | 5 | -40249 | 80508 | 1.00   | 0.317031      |
| Equal speciation and extinction rate ( $\mu_0 = \mu_1, \lambda_0 = \lambda_1$ ) | 4 | -40268 | 80544 | 39.01  | 3.373e-09***  |
| Equal transition rate ( $q_{01} = q_{10}$ )                                     | 5 | -40256 | 80521 | 13.83  | 0.000199***   |
| Transition rate $1 \rightarrow 0 = 0$ ( $q_{10} = 0$ ) no reversal              | 5 | -40248 | 80506 | 1.17   | 1             |
| Transition rate $0 \rightarrow 1 = 0$ ( $q_{01} = 0$ )                          | 4 | -40767 | 81545 | 1037.2 | < 2.2e-16 *** |

**Table S8.** Parameter estimates from the BiSSE analysis evaluating nutritional modes using coding regime I. 0 = non-ECM, 1 = ECM ( $\lambda$  = speciation rate;  $\mu$  = extinction rate;  $r$  = net diversification rate;  $q$  = transition rate).

|                                                                                 | $\lambda_0$ | $\lambda_1$ | $\mu_0$ | $\mu_1$ | $r_0$   | $r_1$   | $q_{01}$ | $q_{10}$ |
|---------------------------------------------------------------------------------|-------------|-------------|---------|---------|---------|---------|----------|----------|
| Unconstrained model                                                             | 0.03849     | 0.09676     | 0.01531 | 0.04909 | 0.02318 | 0.04767 | 0.0006   | 0.00096  |
| Equal speciation rate ( $\lambda_0 = \lambda_1$ )                               | 0.06634     | 0.06634     | 0.04883 | 0.00955 | 0.01751 | 0.05679 | 0.00028  | 0.00155  |
| Equal extinction rate ( $\mu_0 = \mu_1$ )                                       | 0.0457      | 0.07942     | 0.02527 | 0.02527 | 0.02043 | 0.05415 | 0.00043  | 0.00122  |
| Equal speciation and extinction rate ( $\mu_0 = \mu_1, \lambda_0 = \lambda_1$ ) | 0.08158     | 0.08158     | 0.05264 | 0.05264 | 0.02894 | 0.02894 | 0.00063  | 0.00094  |
| Equal transition rate ( $q_{01} = q_{10}$ )                                     | 0.03758     | 0.10079     | 0.01379 | 0.0544  | 0.02379 | 0.04639 | 0.00081  | 0.00081  |
| Transition rate $1 \rightarrow 0 = 0$ ( $q_{10} = 0$ ) no reversal              | 0.03707     | 0.10459     | 0.00634 | 0.05943 | 0.03073 | 0.04516 | 0.00601  | 0        |
| Transition rate $0 \rightarrow 1 = 0$ ( $q_{01} = 0$ )                          | 0.03398     | 0.11117     | 0.0101  | 0.0702  | 0.02388 | 0.04097 | 0        | 0.00185  |

**Table S9.** Nutritional mode BiSEE model testing. All models were compared against the unconstrained model ( $\lambda$  = speciation rate;  $\mu$  = extinction rate;  $r$  = net diversification rate;  $q$  = transition rate; AIC = Akaike information criterion). The best models are indicated in bold. \*\*\* $P < 0.001$ , \*\* $P < 0.01$ .

| Model                                                              | Df | Ln-likelihood | AIC   | X <sup>2</sup> | P(> Chi )   |
|--------------------------------------------------------------------|----|---------------|-------|----------------|-------------|
| Unconstrained model                                                | 6  | -39913        | 79839 |                |             |
| Equal speciation rate ( $\lambda_0 = \lambda_1$ )                  | 5  | -39913        | 79836 | 0.30           | 1.00000     |
| Equal extinction rate ( $\mu_0 = \mu_1$ )                          | 5  | -39913        | 79837 | 0.31           | 0.57940     |
| Equal speciation and extinction rate ( $r_0 = r_1$ )               | 4  | -39914        | 79836 | 1.39           | 0.49957     |
| Equal transition rate ( $q_{01} = q_{10}$ )                        | 5  | -39918        | 79847 | 10.05          | 0.00152 **  |
| Transition rate $1 \rightarrow 0 = 0$ ( $q_{10} = 0$ ) no reversal | 5  | -39957        | 79924 | 87.17          | < 2e-16 *** |
| Transition rate $0 \rightarrow 1 = 0$ ( $q_{01} = 0$ )             | 5  | -40205        | 80420 | 583.89         | < 2e-16 *** |

**Table S10.** Parameter estimates from the MuSSE analysis evaluating nutritional modes using coding regime II. saprotrophs, ECM, pathogens ( $\lambda$  = speciation rate;  $\mu$  = extinction rate;  $r$  = net diversification rate;  $q$  = transition rate). Note. saprotrophs that are also pathogens were included in the category of pathogens. Endophytes, lichen forming fungi or the ones with unknown status were coded as NA.

|                          | Saprotrophs | ECM     | Pathogens |
|--------------------------|-------------|---------|-----------|
| Speciation rate          | 0.07485     | 0.07878 | 0.06892   |
| Extinction rate          | 0.03997     | 0.0493  | 0.05429   |
| Net diversification rate | 0.03488     | 0.02948 | 0.01463   |

**Table S11.** Nutritional mode MuSSE model testing coding regime II. All models were compared against the unconstrained model ( $\lambda$  = speciation rate;  $\mu$  = extinction rate;  $r$  = net diversification rate;  $q$  = transition rate; AIC = Akaike information criterion). The best models are indicated in bold. \* $P < 0.05$ .

| Model                                                         | Df | Ln-likelihood | AIC   | X <sup>2</sup> | P(> Chi ) |
|---------------------------------------------------------------|----|---------------|-------|----------------|-----------|
| Unconstrained model                                           | 12 | -40391        | 80805 |                |           |
| Equal speciation and extinction rate ( $r_1 = r_2 = r_3$ )    | 8  | -40396        | 80808 | 11.3106        | 0.02329 * |
| Equal speciation rate ( $\lambda_1 = \lambda_2 = \lambda_3$ ) | 10 | -40391        | 80802 | 1.2288         | 0.54096   |
| Equal extinction rate ( $\mu_1 = \mu_2 = \mu_3$ )             | 10 | -40393        | 80807 | 5.6964         | 0.05795   |
| Equal speciation and extinction (SAP and ECM)                 | 10 | -40392        | 80803 | 2.2509         | 0.32451   |

**Table S12.** Parameter estimates from the MuSSE analysis evaluating nutritional modes using coding regime III. wood decayers, saprotrophs, ECM, pathogens ( $\lambda$  = speciation rate;  $\mu$  = extinction rate;  $r$  = net diversification rate;  $q$  = transition rate). Note. saprotrophs that are also pathogens were included in the category of pathogens. Endophytes, lichen forming fungi or the ones with unknown status were coded as NA.

|                          | Wood decayers | Other saprotrophs | ECM     | Pathogens |
|--------------------------|---------------|-------------------|---------|-----------|
| Speciation rate          | 0.04333       | 0.11631           | 0.07812 | 0.07151   |
| Extinction rate          | 0.01255       | 0.08246           | 0.04847 | 0.05109   |
| Net diversification rate | 0.03078       | 0.03385           | 0.02965 | 0.02042   |

**Table S13.** Nutritional mode MuSSE model testing coding regime III. All models were compared against the unconstrained model ( $\lambda$  = speciation rate;  $\mu$  = extinction rate;  $r$  = net diversification rate;  $q$  = transition rate; AIC = Akaike information criterion). The best models are indicated in bold. \*\*\*P < 0.001.

| Model                                                               | Df | Ln-likelihood | AIC   | X <sup>2</sup> | P(> Chi )     |
|---------------------------------------------------------------------|----|---------------|-------|----------------|---------------|
| Unconstrained model                                                 | 20 | -40667        | 81375 |                |               |
| Equal speciation and extinction rate ( $r_1=r_2=r_3=r_4$ )          | 14 | -40877        | 81782 | 418.80         | < 2.2e-16 *** |
| Equal speciation rate ( $\lambda_1=\lambda_2=\lambda_3=\lambda_4$ ) | 17 | -40774        | 81582 | 212.81         | < 2.2e-16 *** |
| Equal extinction rate ( $\mu_1=\mu_2=\mu_3=\mu_4$ )                 | 17 | -40731        | 81495 | 126.44         | < 2.2e-16 *** |
| Equal speciation and extinction (Wood, SAP, ECM)                    | 16 | -40869        | 81769 | 402.33         | < 2.2e-16 *** |
| Equal speciation and extinction (Wood, ECM)                         | 18 | -40736        | 81508 | 137.33         | < 2.2e-16 *** |

**Table S14.** Parameter estimates from the MuSSE analysis evaluating nutritional modes using coding regime IV. wood decayers, saprotrophs, ECM, pathogens ( $\lambda$  = speciation rate;  $\mu$  = extinction rate;  $r$  = net diversification rate;  $q$  = transition rate). Note. saprotrophs that are also pathogens were included in the category of pathogens. Endophytes, lichen forming fungi or the ones with unknown status were coded as NA.

|                          | Brown rot | White rot | Other SAP | ECM     | Pathogen |
|--------------------------|-----------|-----------|-----------|---------|----------|
| Speciation rate          | 0.02233   | 0.0461    | 0.10159   | 0.07535 | 0.06149  |
| Extinction rate          | 0.0008    | 0.01537   | 0.06129   | 0.04481 | 0.03817  |
| Net diversification rate | 0.02153   | 0.03073   | 0.0403    | 0.03054 | 0.02332  |

**Table S15.** Nutritional mode MuSSE model testing coding regime IV. All models were compared against the unconstrained model ( $\lambda$  = speciation rate;  $\mu$  = extinction rate;  $r$  = net diversification rate;  $q$  = transition rate; AIC = Akaike information criterion). The best models are indicated in bold. \*\*\*P < 0.001.

| Model                                                                         | Df | Ln-likelihood | AIC   | X <sup>2</sup> | P(> Chi )     |
|-------------------------------------------------------------------------------|----|---------------|-------|----------------|---------------|
| Unconstrained model                                                           | 30 | -40748        | 81557 |                |               |
| Equal speciation and extinction rate ( $r_1=r_2=r_3=r_4=r_5$ )                | 22 | -40957        | 81958 | 416.77         | < 2.2e-16 *** |
| Equal speciation rate ( $\lambda_1=\lambda_2=\lambda_3=\lambda_4=\lambda_5$ ) | 26 | -40853        | 81759 | 209.88         | < 2.2e-16 *** |
| Equal extinction rate ( $\mu_1=\mu_2=\mu_3=\mu_4=\mu_5$ )                     | 26 | -40796        | 81643 | 94.20          | < 2.2e-16 *** |

**Table S16.** Parameter estimates from the MuSSE analysis evaluating nutritional modes using coding regime II in which saprotrophs that are also pathogens were included in the category of saprotrophs. saprotrophs, ECM, pathogens ( $\lambda$  = speciation rate;  $\mu$  = extinction rate;  $r$  = net diversification rate;  $q$  = transition rate).

|                          | Saprotrophs | ECM     | Pathogens |
|--------------------------|-------------|---------|-----------|
| Speciation rate          | 0.06595     | 0.07827 | 0.02169   |
| Extinction rate          | 0.02327     | 0.0486  | 0         |
| Net diversification rate | 0.04268     | 0.02967 | 0.02169   |

**Table S17.** Nutritional mode MuSSE model testing coding regime II in which saprotrophs that are also pathogens are considered as saprotrophs. All models were compared against the unconstrained model ( $\lambda$  = speciation rate;  $\mu$  = extinction rate;  $r$  = net diversification rate;  $q$  = transition rate; AIC = Akaike information criterion). The best models are indicated in bold. \*\*\*P < 0.001.

| Model                                                     | Df | Ln-likelihood | AIC   | X <sup>2</sup> | P(> Chi )     |
|-----------------------------------------------------------|----|---------------|-------|----------------|---------------|
| Unconstrained model                                       | 12 | -40067        | 80157 |                |               |
| Equal speciation and extinction rate ( $r_1=r_2=r_3$ )    | 8  | -40163        | 80342 | 192.951        | < 2.2e-16 *** |
| Equal speciation rate ( $\lambda_1=\lambda_2=\lambda_3$ ) | 10 | -40102        | 80224 | 70.748         | 4.441e-16 *** |
| Equal extinction rate ( $\mu_1=\mu_2=\mu_3$ )             | 10 | -40102        | 80224 | 70.743         | 4.441e-16 *** |
| Equal speciation and extinction (SAP and ECM)             | 10 | 40118         | 80255 | 102.034        | < 2.2e-16 *** |

**Table S18.** Clades where an origin of ECM occurred, genera included, estimated number of species, crown and stem age, mean diversification rates of the ECM clades and their non-ECM sister groups. Numbers in the first column correspond to those in figures S13 and S14. Asterisks (\*) indicate clades where putative losses or transitions to pathogens have occurred.

| Clade | Genera in each clade                                                                                                                                                                                                                                                                                                                                                                                                                                                                                               | Estimated number of species | Crown age (Mya) | Stem age (Mya) | ECM clade net diversification rate | Non-ECM sister clade diversification rate |
|-------|--------------------------------------------------------------------------------------------------------------------------------------------------------------------------------------------------------------------------------------------------------------------------------------------------------------------------------------------------------------------------------------------------------------------------------------------------------------------------------------------------------------------|-----------------------------|-----------------|----------------|------------------------------------|-------------------------------------------|
| 1     | Sebacina, Tremelloscypha, Helvellosebacina, Tremellodendron                                                                                                                                                                                                                                                                                                                                                                                                                                                        | 32                          | 271             | 289            | 0.008929594                        | 0.009400322                               |
| 2     | Tulasnella                                                                                                                                                                                                                                                                                                                                                                                                                                                                                                         | 10                          | 221             | 265            | 0.013318341                        | 0                                         |
| 3     | Ceratobasidium                                                                                                                                                                                                                                                                                                                                                                                                                                                                                                     | 1                           | 91              | 91             | 0.04068652                         | 0                                         |
| 4     | Sistotrema1, Hydnum                                                                                                                                                                                                                                                                                                                                                                                                                                                                                                | 35                          | 218             | 233            | 0.012159663                        | 0.014191934                               |
| 5     | Sistotrema2, Clavulina, Membranomyces                                                                                                                                                                                                                                                                                                                                                                                                                                                                              | 43                          | 182             | 195            | 0.018619874                        | 0.012239036                               |
| 6     | Cantharellus, Craterellus, Afrocantharellus                                                                                                                                                                                                                                                                                                                                                                                                                                                                        | 119                         | 244             | 260            | 0.015427151                        | 0                                         |
| 7     | Hysterangiales. Protuberia, Phallogaster, Trappea, Hysterangium, Gallaceae, Hallingea, Austrogautieria, Gummiglobus, Nothocastoreum, Andebbia, Mesophellia, Malajczukia, Phlebogaster, Aroramycetes, Castoreum                                                                                                                                                                                                                                                                                                     | 78                          | 200             | 216            | 0.017391061                        | 0.020016643                               |
| 8     | Clavariadelphus, Ramaria_1                                                                                                                                                                                                                                                                                                                                                                                                                                                                                         | 25                          | 185             | 200            | 0.018394491                        | 0.017450909                               |
| 9     | Ramaria (most), Gloeocantharellus, Turbinellus, Gomphus, Gautieria                                                                                                                                                                                                                                                                                                                                                                                                                                                 | 112                         | 194             | 207            | 0.018143223                        | 0.018558556                               |
| 10    | Coltricia, Coltriciella                                                                                                                                                                                                                                                                                                                                                                                                                                                                                            | 37                          | 65              | 71             | 0.050677816                        | 0                                         |
| 11    | Nealbatrellus, Polyporoletus, Laeticutis, Albatrellus, Xeroceps, Fevansia, Leucogaster, Byssoporia                                                                                                                                                                                                                                                                                                                                                                                                                 | 20                          | 185             | 216            | 0.013864007                        | 0                                         |
| 12    | Multifurca, Lactarius, Russula, Lactifluus                                                                                                                                                                                                                                                                                                                                                                                                                                                                         | 610                         | 188             | 195            | 0.030948487                        | 0.014383666                               |
| 13*   | Thelephora, Tomentella, Polyozellus, Pseudotomentella, Sarcodon, Hydnellum, Tomentellopsis, Phellodon, Boletopsis                                                                                                                                                                                                                                                                                                                                                                                                  | 53                          | 161             | 175            | 0.027788577                        | 0.02691748                                |
| 14    | Byssocorticium                                                                                                                                                                                                                                                                                                                                                                                                                                                                                                     | 4                           | 96              | 144            | 0.025421164                        | 0                                         |
| 15    | Tylospora, Amphinema                                                                                                                                                                                                                                                                                                                                                                                                                                                                                               | 10                          | 104             | 118            | 0.023837319                        | 0                                         |
| 16    | Tretomyces, Piloderma                                                                                                                                                                                                                                                                                                                                                                                                                                                                                              | 10                          | 78              | 91             | 0.022512521                        | 0                                         |
| 17    | Gymnopaxillus, Austropaxillus                                                                                                                                                                                                                                                                                                                                                                                                                                                                                      | 10                          | 62              | 72             | 0.021840384                        | 0                                         |
| 18*   | Rhizopogon, Suillus, Truncocolumella                                                                                                                                                                                                                                                                                                                                                                                                                                                                               | 63                          | 58              | 76             | 0.084447888                        | 0                                         |
| 19    | Scleroderma, Diplocystis, Astraeus, Tremellogaster, Calostoma, Gyroporus, Pisolithus, Corditurbera                                                                                                                                                                                                                                                                                                                                                                                                                 | 84                          | 57              | 62             | 0.066428038                        | 0.067409965                               |
| 20    | Melanogaster, Alpova, Paragyrodon, Paxillus, Gyrodon                                                                                                                                                                                                                                                                                                                                                                                                                                                               | 21                          | 49              | 59             | 0.066431698                        | 0.071039873                               |
| 21*   | Afroboletus, Alessioporos, Aureoboletus, Australopilus, Austroboletus, Baorangia, Boletellus, Boletus, Borofutus, Bothia, Butyriboletus, Caloboletus, Castellanea, Chamonixia, Chiu, Corneroboletus, Costatisporus, Crocinoboletus, Cupreoboletus, Cyanoboletus, Duraniella, Exsudoporus, Fistulinella, Gastroboletus, Guyanaporos, Gymnogaster, Harrya, Heimioporos, Heliogaster, Hemileccinum, Hortiboletus, Hourangia, Imleria, Imperator, Jimtrappea, Kombocles, Lanmaoa, Leccinellum, Leccinum, Mackintoshia, | 666                         | 62              | 66             | 0.075188315                        | 0.067606279                               |



Mucilopilus, Mycoamaranthus,  
 Neoboletus, Nigroboletus, Octaviania,  
 Parvixeroconus, Phylloporus,  
 Porphyrellus, Pseudoastroboletus,  
 Pulveroboletus, Retiboletus,  
 Roosbeevera, Royoungia, Rubinoboletus,  
 Rubroboletus, Rugiboletus,  
 Singerocomus, Solioccasus, Spongiforma,  
 Stobilomyces, Suillellus, Sutorius,  
 Tylopilus, Veloporphyrellus,  
 Veloporphyrellus, Xanthoconium,  
 Xerocomellus, Xerocomus,  
 Zangia, Phylloboletellus

|     |                                         |     |    |    |             |             |
|-----|-----------------------------------------|-----|----|----|-------------|-------------|
| 22  | Hygrophorus                             | 25  | 80 | 87 | 0.05458382  | 0.04839526  |
| 23  | Amanita                                 | 360 | 75 | 79 | 0.053408364 | 0.054149675 |
| 24  | Catathelasma                            | 3   | 37 | 56 | 0.053202838 | 0.053778648 |
| 25  | Guyanagarika                            | 4   | 39 | 52 | 0.052403965 | 0           |
| 26  | Albomagister                            | 3   | 26 | 40 | 0.050889798 | 0           |
| 27  | Porpoloma                               | 10  | 47 | 57 | 0.051766076 | 0.05175836  |
| 28  | Tricholoma                              | 50  | 67 | 71 | 0.06808559  | 0.054038023 |
| 29  | Lyophyllum                              | 18  | 56 | 64 | 0.053051543 | 0.052869045 |
| 30* | Entoloma                                | 26  | 58 | 65 | 0.09117641  | 0.090196146 |
| 31  | Laccaria, Hydangium                     | 45  | 56 | 59 | 0.069617107 | 0.111167663 |
| 32  | Cortinarius                             | 506 | 83 | 85 | 0.093826141 | 0.061679851 |
|     | Setchelliogaster, Descolea, Descomyces, |     |    |    |             |             |
| 33  | Wakefieldia                             | 8   | 63 | 76 | 0.058655341 | 0.068036751 |
| 34  | Phaeocollybia                           | 16  | 47 | 52 | 0.062074359 | 0           |
|     | Hebeloma, Naucoria, Alnicola,           |     |    |    |             |             |
| 35  | Hymenogaster                            | 14  | 42 | 49 | 0.112161144 | 0.111915803 |
|     | Inocybe, Auritella, Tubariomyces,       |     |    |    |             |             |
| 36  | Mallocybe                               | 622 | 65 | 68 | 0.071245432 | 0.08122333  |

**Table S19.** List of fossils to estimate divergence times in Agaricomycetes

| Fossil                    | Node                 | Minimum age | Reference                |
|---------------------------|----------------------|-------------|--------------------------|
| Hymenochaetales           |                      |             |                          |
| Quatsinoporites cranhamii | MRCA Hymenochaetales | 125-129     | Smith et al., 2004       |
| Agaricales                |                      |             |                          |
| Palaeoagaricites antiquus | MRCA Agaricales      | 100-110     | Poinar and Buckley, 2007 |
| Archaeomarasmus legetti   | MRCA Marasmiaceae    | 90-94       | Hibbet et al. 1997       |
| Nidula baltica            | MRCA Nidulariaceae   | 40          | Poinar, 2014             |
| Polyporales               |                      |             |                          |
| Ganodermites lybicus      | MRCA Ganoderma       | 18          | Fleischmann et al., 2007 |
| Boletales                 |                      |             |                          |
| Suillus/Rhizopogon ECM    | MRCA Suillaceae      | 45          | Lepage et al., 1997      |

## SI References

1. Smith SY, Currah RS, Stockey RA (2004) Cretaceous and Eocene poroid hymenophores from Vancouver Island, British Columbia. *Mycologia* 96(1):180–186.
2. Poinar GO, Buckley R (2007) Evidence of mycoparasitism and hypermycoparasitism in Early Cretaceous amber. *Mycol Res* 111(4):503–506.
3. Hibbet DS, Grimaldi D, Donoghue MJ (1997) Fossil mushrooms from Miocene and Cretaceous ambers and the evolution of Homobasidiomycetes. *Am J Bot* 84(8):981–991.
4. Poinar G (2014) Bird's nest fungi (Nidulariales: Nidulariaceae) in Baltic and Dominican amber. *Fungal Biol* 118(3):325–329.
5. Fleischmann A, Krings M, Mayr H, Agerer R (2007) Structurally preserved polypores from the Neogene of North Africa: *Ganodermites libycus* gen. et sp. nov. (Polyporales, Ganodermataceae). *Rev Palaeobot Palynol* 145(1–2):159–172.
6. Lepage BA, Currah RS, Stockey RA, Rothwell GW (1997) Fossil ectomycorrhizae from the middle Eocene. *Am J Bot* 84(3):410–412.
